# Supplementary material for: IFN signaling and neutrophil degranulation transcriptional signatures are induced during SARS-CoV-2 infection
Source: PubMed Central journal article supplement (PMC7935909; doi:10.1038/s42003-021-01829-4), 2021-03-05
Supplement: 42003_2021_1829_MOESM1_ESM.pdf [file 42003_2021_1829_MOESM1_ESM.pdf]

**Supplementary Table 1:** Significant Reactome and KEGG pathway enrichment among the 1,026 genes significantly upregulated by COVID-19.

| Pathway ID      | Pathway description                                             | Total pathway size | # Significant genes | FDR-corrected P value |
|-----------------|-----------------------------------------------------------------|--------------------|---------------------|-----------------------|
| <b>Reactome</b> |                                                                 |                    |                     |                       |
| R-HSA-6798695   | Neutrophil degranulation                                        | 479                | 65                  | 1.1E-07               |
| R-HSA-168256    | Immune System                                                   | 1997               | 162                 | 1.0E-03               |
| R-HSA-168249    | Innate Immune System                                            | 1053               | 95                  | 3.1E-03               |
| R-HSA-162906    | HIV Infection                                                   | 232                | 31                  | 4.3E-03               |
| R-HSA-72766     | Translation                                                     | 291                | 36                  | 4.3E-03               |
| R-HSA-162587    | HIV Life Cycle                                                  | 151                | 22                  | 0.016                 |
| R-HSA-5368287   | Mitochondrial translation                                       | 93                 | 16                  | 0.019                 |
| R-HSA-8953854   | Metabolism of RNA                                               | 673                | 63                  | 0.019                 |
| R-HSA-72306     | tRNA processing                                                 | 106                | 17                  | 0.021                 |
| R-HSA-5389840   | Mitochondrial translation elongation                            | 87                 | 15                  | 0.021                 |
| R-HSA-162599    | Late Phase of HIV Life Cycle                                    | 138                | 20                  | 0.021                 |
| R-HSA-9018679   | Biosynthesis of EPA-derived SPMs                                | 6                  | 4                   | 0.024                 |
| R-HSA-913531    | Interferon Signaling                                            | 197                | 25                  | 0.024                 |
| R-HSA-8978868   | Fatty acid metabolism                                           | 177                | 23                  | 0.027                 |
| R-HSA-6781823   | Formation of TC-NER Pre-Incision Complex                        | 54                 | 11                  | 0.027                 |
| R-HSA-5696399   | Global Genome Nucleotide Excision Repair (GG-NER)               | 84                 | 14                  | 0.034                 |
| R-HSA-159231    | Transport of Mature mRNA Derived from an Intron less Transcript | 40                 | 9                   | 0.040                 |
| R-HSA-5419276   | Mitochondrial translation termination                           | 87                 | 14                  | 0.044                 |
| R-HSA-159234    | Transport of Mature mRNAs Derived from Intron less Transcripts  | 41                 | 9                   | 0.044                 |
| R-HSA-1236975   | Antigen processing-Cross presentation                           | 99                 | 15                  | 0.048                 |
| R-HSA-6781827   | Transcription-Coupled Nucleotide Excision Repair (TC-NER)       | 79                 | 13                  | 0.048                 |
| <b>KEGG</b>     |                                                                 |                    |                     |                       |
| KEGG:01100      | Metabolic pathways                                              | 1391               | 131                 | 1.9E-04               |
| KEGG:00020      | Citrate cycle (TCA cycle)                                       | 32                 | 10                  | 2.4E-03               |
| KEGG:03060      | Protein export                                                  | 24                 | 8                   | 0.010                 |
| KEGG:01212      | Fatty acid metabolism                                           | 55                 | 12                  | 0.018                 |
| KEGG:00280      | Valine, leucine and isoleucine degradation                      | 48                 | 11                  | 0.021                 |

**Supplementary Table 2:** Significant Reactome and KEGG pathway enrichment among the 1,109 genes significantly downregulated by COVID-19.

| Pathway ID      | Pathway description                                          | Total pathway size | # Significant genes | FDR-corrected P value |
|-----------------|--------------------------------------------------------------|--------------------|---------------------|-----------------------|
| <b>Reactome</b> |                                                              |                    |                     |                       |
| R-HSA-5653656   | Vesicle-mediated transport                                   | 667                | 74                  | 2.5E-05               |
| R-HSA-199991    | Membrane Trafficking                                         | 628                | 66                  | 6.1E-04               |
| R-HSA-1442490   | Collagen degradation                                         | 64                 | 14                  | 6.4E-03               |
| R-HSA-73887     | Death Receptor Signaling                                     | 141                | 22                  | 6.4E-03               |
| R-HSA-194315    | Signaling by Rho GTPases                                     | 444                | 47                  | 7.8E-03               |
| R-HSA-8948216   | Collagen chain trimerization                                 | 44                 | 11                  | 7.8E-03               |
| R-HSA-2022090   | Assembly of collagen fibrils and other multimeric structures | 61                 | 13                  | 7.9E-03               |
| R-HSA-1474290   | Collagen formation                                           | 90                 | 16                  | 9.5E-03               |
| R-HSA-170834    | Signaling by TGF-beta Receptor Complex                       | 73                 | 14                  | 0.011                 |
| R-HSA-1650814   | Collagen biosynthesis and modifying enzymes                  | 67                 | 13                  | 0.013                 |
| R-HSA-3247509   | Chromatin modifying enzymes                                  | 275                | 32                  | 0.013                 |
| R-HSA-4839726   | Chromatin organization                                       | 275                | 32                  | 0.013                 |
| R-HSA-194840    | Rho GTPase cycle                                             | 138                | 20                  | 0.014                 |
| R-HSA-2214320   | Anchoring fibril formation                                   | 15                 | 6                   | 0.014                 |
| R-HSA-9006934   | Signaling by Receptor Tyrosine Kinases                       | 455                | 45                  | 0.022                 |
| R-HSA-9006936   | Signaling by TGF-beta family members                         | 102                | 16                  | 0.022                 |
| R-HSA-446353    | Cell-extracellular matrix interactions                       | 18                 | 6                   | 0.033                 |
| R-HSA-2243919   | Crosslinking of collagen fibrils                             | 18                 | 6                   | 0.033                 |
| R-HSA-1474228   | Degradation of the extracellular matrix                      | 140                | 19                  | 0.033                 |
| R-HSA-193704    | p75 NTR receptor-mediated signaling                          | 97                 | 15                  | 0.033                 |
| R-HSA-193648    | NRAGE signals death through JNK                              | 59                 | 11                  | 0.037                 |
| R-HSA-416482    | G alpha (12/13) signaling events                             | 79                 | 13                  | 0.038                 |
| R-HSA-3000480   | Scavenging by Class A Receptors                              | 19                 | 6                   | 0.038                 |
| R-HSA-5140745   | WNT5A-dependent internalization of FZD2, FZD5 and ROR2       | 13                 | 5                   | 0.040                 |
| R-HSA-9007101   | Rab regulation of trafficking                                | 124                | 17                  | 0.047                 |
| <b>KEGG</b>     |                                                              |                    |                     |                       |
| KEGG:04144      | Endocytosis                                                  | 231                | 37                  | 3.0E-06               |
| KEGG:05165      | Human papillomavirus infection                               | 314                | 42                  | 6.3E-05               |
| KEGG:04510      | Focal adhesion                                               | 194                | 29                  | 4.3E-04               |
| KEGG:04530      | Tight junction                                               | 150                | 24                  | 9.1E-04               |
| KEGG:05135      | Yersinia infection                                           | 116                | 20                  | 1.7E-03               |
| KEGG:05132      | Salmonella infection                                         | 205                | 26                  | 0.023                 |
| KEGG:04390      | Hippo signaling pathway                                      | 146                | 20                  | 0.045                 |

**Supplementary Table 3:** Significant Reactome and KEGG pathway enrichment among the 86 genes significantly upregulated by COVID-19 only in Juvenile macaques.

| Pathway ID      | Pathway description             | Total pathway size | # Significant genes | FDR-corrected P value |
|-----------------|---------------------------------|--------------------|---------------------|-----------------------|
| <b>Reactome</b> |                                 |                    |                     |                       |
| R-HSA-909733    | Interferon alpha/beta signaling | 69                 | 5                   | 0.033                 |
| <b>KEGG</b>     |                                 |                    |                     |                       |
| KEGG:04330      | Notch signaling pathway         | 53                 | 4                   | 9.9E-03               |
| KEGG:05160      | Hepatitis C                     | 140                | 5                   | 0.047                 |

**Supplementary Table 4:** Significant Reactome and KEGG pathway enrichment among the 160 genes significantly downregulated by COVID-19 only in Old macaques.

| Pathway ID      | Pathway description  | Total pathway size | # Significant genes | FDR-corrected P value |
|-----------------|----------------------|--------------------|---------------------|-----------------------|
| <b>Reactome</b> |                      |                    |                     |                       |
| R-HSA-4420097   | VEGFA-VEGFR2 Pathway | 99                 | 7                   | 0.037                 |
| R-HSA-194138    | Signaling by VEGF    | 107                | 7                   | 0.037                 |
| <b>KEGG</b>     |                      |                    |                     |                       |
| KEGG:04611      | Platelet activation  | 122                | 8                   | 2.5E-03               |
| KEGG:05206      | MicroRNAs in cancer  | 158                | 8                   | 0.016                 |
