# Supplementary material for: IFN signaling and neutrophil degranulation transcriptional signatures are induced during SARS-CoV-2 infection
Source: PubMed Central journal article supplement (PMC7935909; doi:10.1038/s42003-021-01829-4), 2021-03-05
Supplement: 42003_2021_1829_MOESM2_ESM.pdf [file 42003_2021_1829_MOESM2_ESM.pdf]

## **Description of Additional Supplementary Files**

### **File name: Supplementary Data 1**

**Description:** Read processing and mapping statistics, and download accessions for all RNA-seq samples and clinical data from SARS-CoV-2 infected macaques.

### **File name: Supplementary Data 2**

**Description:** Fragment counts, relative gene expression levels, gene annotations, and differential expression data for every macaque gene.

### **File name: Supplementary Data 3**

**Description:** Complete lists of significantly differentially expressed gene sets of interest (including gene names, relative expression data, fold change and P values). Gene sets include: (A) 1,026 genes significantly upregulated with COVID-19 vs Naive, (B) 65 "neutrophil degranulation" (R-HSA-6798695) genes significantly upregulated during COVID-19, (C) 162 "neutrophil degranulation" (R-HSA-6798695) genes significantly upregulated during COVID-19, (D) 1,109 genes significantly downregulated with COVID-19 vs Naive, (E) 14 "collagen degradation" (R-HSA-1442490) genes significantly downregulated during COVID-19, (F) 14 "Signaling by TGF-beta Receptor Complex" (R-HSA-170834) genes significantly downregulated during COVID-19, (G) 86 genes significantly upregulated with COVID-19 vs Naive only in Juvenile macaques, (H) 96 genes significantly downregulated with COVID-19 vs Naive only in Juvenile macaques, (I) 97 genes significantly upregulated with COVID-19 vs Naive only in Old macaques, (J) 160 genes significantly downregulated with COVID-19 vs Naive only in Old macaques, (K) 97

genes significantly upregulated by both COVID-19 and TB and (L) 76 genes significantly upregulated by COVID-19 but downregulated by TB.

**File name: Supplementary Data 4**

**Description:** Significant functional enrichment for Reactome, KEGG and Gene Ontology pathways, among differentially gene sets of interest. Gene sets include: (A) 1,026 genes upregulated in COVID-19 vs Naive, (B) 1,109 genes downregulated in COVID-19 vs Naive, (C) 86 genes significantly upregulated by COVID-19 only in Juvenile macaques, (D) 160 genes significantly downregulated by COVID-19 only in Old macaques, (E) 97 genes significantly upregulated by both COVID-19 and TB, and (F) 76 genes significantly upregulated by COVID-19 but downregulated by TB.

**File name: Supplementary Data 5**

**Description:** (A) Clinical characteristics and lab parameters of COVID-19 patients. Clinical and demographic data were retrieved from the medical records of all participants. These data included age, gender, anthropometrics, comorbidities, symptoms, triage vital signs, and initial laboratory test results (B) Levels of IFN $\gamma$  (C) Levels of VEGF (D) Neutrophil counts and (E) NLR values from plasma and blood samples of COVID-19 patients.

**File name: Supplementary Data 6**

**Description:** Clinical data of TB-infected macaques.
